# Supplementary material for: A new spinel high-entropy oxide (Mg0.2Ti0.2Zn0.2Cu0.2Fe0.2)3O4 with fast reaction kinetics and excellent stability as an anode material for lithium ion batteries
Source: Royal Society of Chemistry journal article supplement (doi:10.1039/d0ra00255k), 2020-01-01
Supplement: d0ra00255k1.pdf [file d0ra00255k1.pdf]

## Electronic Supplementary Information (ESI)

for

### A new spinel high-entropy oxide ( $\text{Mg}_{0.2}\text{Ti}_{0.2}\text{Zn}_{0.2}\text{Cu}_{0.2}\text{Fe}_{0.2}$ )<sub>3</sub>O<sub>4</sub> with fast reaction kinetic and excellent stability as anode materials for lithium ion batteries

Hong Chen,<sup>a</sup> Nan Qiu,<sup>a,\*</sup> Baozhen Wu,<sup>a</sup> Zhaoming Yang,<sup>a</sup> Sen Sun,<sup>a</sup> and Yuan Wang<sup>a,\*</sup>

<sup>a</sup> Key Laboratory of Radiation Physics and Technology, Ministry of Education, Institute of Nuclear Science and Technology, Sichuan University, Chengdu 610064, People's Republic of China.

\* Corresponding authors

E-mail: qiun@scu.edu.cn (N. Q.) and wyuan@scu.edu.cn (Y. W.)

#### Table of Contents:

|                                                                                                                                                                                                                                                                        |
|------------------------------------------------------------------------------------------------------------------------------------------------------------------------------------------------------------------------------------------------------------------------|
| <b>Figure S1.</b> EDS analysis result of the synthesized ( $\text{Mg}_{0.2}\text{Ti}_{0.2}\text{Zn}_{0.2}\text{Cu}_{0.2}\text{Fe}_{0.2}$ ) <sub>3</sub> O <sub>4</sub> particles.                                                                                      |
| <b>Figure S2.</b> N <sub>2</sub> adsorption-desorption isotherms and the BJH pore size distribution curves of the synthesized ( $\text{Mg}_{0.2}\text{Ti}_{0.2}\text{Zn}_{0.2}\text{Cu}_{0.2}\text{Fe}_{0.2}$ ) <sub>3</sub> O <sub>4</sub> particles.                 |
| <b>Figure S3.</b> XPS survey scan spectrum of the synthesized ( $\text{Mg}_{0.2}\text{Ti}_{0.2}\text{Zn}_{0.2}\text{Cu}_{0.2}\text{Fe}_{0.2}$ ) <sub>3</sub> O <sub>4</sub> particles.                                                                                 |
| <b>Figure S4.</b> High-resolution XPS spectra of the synthesized ( $\text{Mg}_{0.2}\text{Ti}_{0.2}\text{Zn}_{0.2}\text{Cu}_{0.2}\text{Fe}_{0.2}$ ) <sub>3</sub> O <sub>4</sub> particles.                                                                              |
| <b>Figure S5.</b> SEM results of the evolution process of ( $\text{Mg}_{0.2}\text{Ti}_{0.2}\text{Zn}_{0.2}\text{Cu}_{0.2}\text{Fe}_{0.2}$ ) <sub>3</sub> O <sub>4</sub> electrodes at a current density of 100 mA g <sup>-1</sup> .                                    |
| <b>Figure S6.</b> Correlation between the scan rates and corresponding currents of the ( $\text{Mg}_{0.2}\text{Ti}_{0.2}\text{Zn}_{0.2}\text{Cu}_{0.2}\text{Fe}_{0.2}$ ) <sub>3</sub> O <sub>4</sub> electrode                                                         |
| <b>Figure S7.</b> The capacitive contribution to the total current contribution for the ( $\text{Mg}_{0.2}\text{Ti}_{0.2}\text{Zn}_{0.2}\text{Cu}_{0.2}\text{Fe}_{0.2}$ ) <sub>3</sub> O <sub>4</sub> electrode at 0.1-0.8 mV s <sup>-1</sup> vs. Li <sup>+</sup> /Li. |
| <b>Table S1.</b> The comparison of lattice parameter, BET surface area values between ( $\text{Mg}_{0.2}\text{Ti}_{0.2}\text{Zn}_{0.2}\text{Cu}_{0.2}\text{Fe}_{0.2}$ ) <sub>3</sub> O <sub>4</sub> and some other solid solutions reported in literature.             |
| <b>Table S2.</b> Summary of electrochemical performance of different transition metal oxides as anode materials for lithium ion batteries.                                                                                                                             |
| <b>Table S3.</b> The kinetic parameters of the fresh ( $\text{Mg}_{0.2}\text{Ti}_{0.2}\text{Zn}_{0.2}\text{Cu}_{0.2}\text{Fe}_{0.2}$ ) <sub>3</sub> O <sub>4</sub> half-cell and the half-cell charged to 3.0 V after 300 discharge/charge cycles.                     |

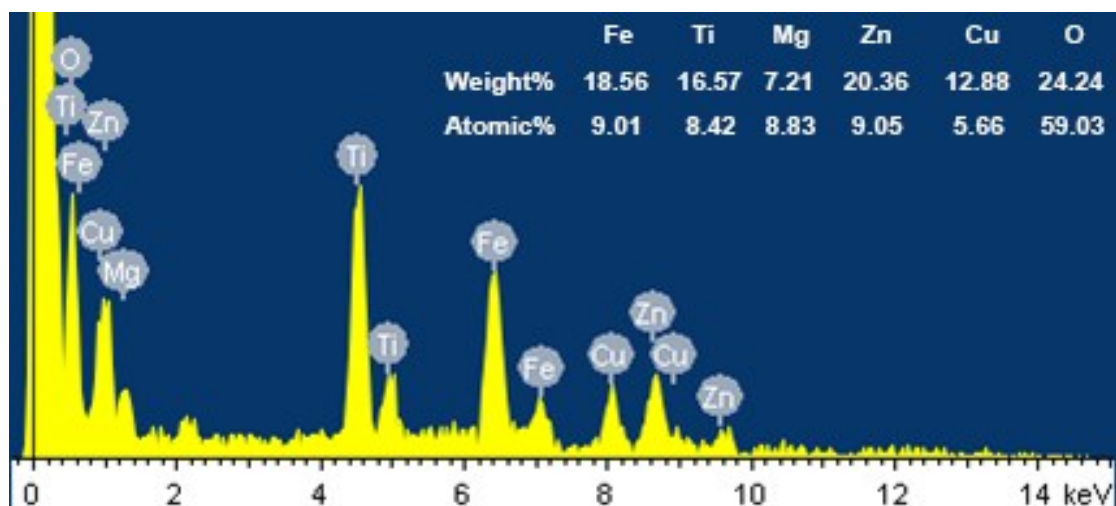

**Fig. S1** EDS analysis result of the synthesized  $(\text{Mg}_{0.2}\text{Ti}_{0.2}\text{Zn}_{0.2}\text{Cu}_{0.2}\text{Fe}_{0.2})_3\text{O}_4$  particles. The corresponding element atomic ratio indicate the homogeneous spatial distributions of each element.

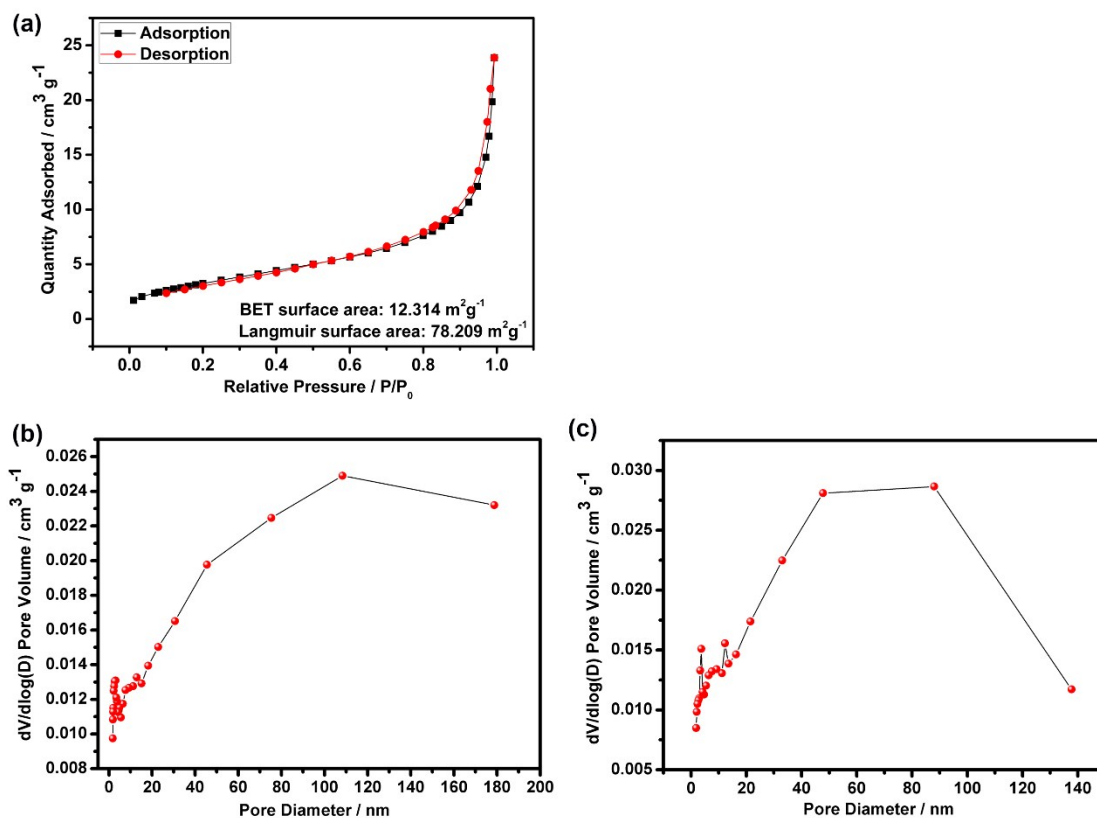

**Fig. S2** (a)  $\text{N}_2$  adsorption-desorption isotherms of the synthesized  $(\text{Mg}_{0.2}\text{Ti}_{0.2}\text{Zn}_{0.2}\text{Cu}_{0.2}\text{Fe}_{0.2})_3\text{O}_4$  particles. The BJH pore size distribution curves based on (b) Adsorption  $dV/d\log(D)$  Pore Volume, (c) Desorption  $dV/d\log(D)$  Pore Volume.

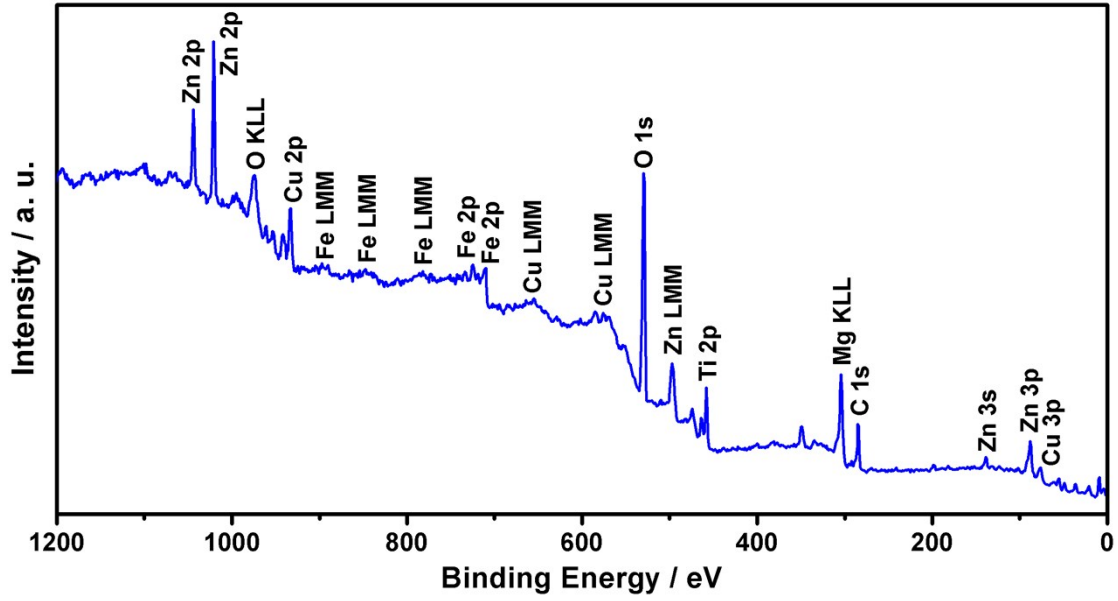

Fig. S3 XPS survey scan spectrum of the synthesized  $(\text{Mg}_{0.2}\text{Ti}_{0.2}\text{Zn}_{0.2}\text{Cu}_{0.2}\text{Fe}_{0.2})_3\text{O}_4$  particles.

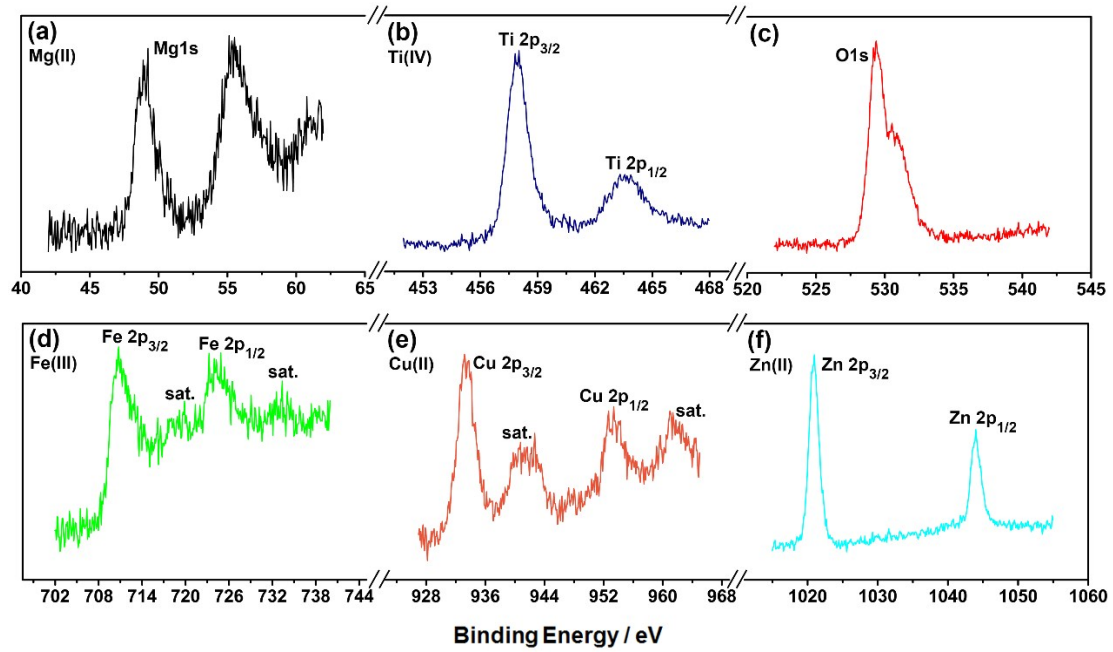

Fig. S4 High-resolution XPS spectra of the synthesized  $(\text{Mg}_{0.2}\text{Ti}_{0.2}\text{Zn}_{0.2}\text{Cu}_{0.2}\text{Fe}_{0.2})_3\text{O}_4$  particles: (a) Mg 1s; (b) Ti 2p; (c) O 1s; (d) Fe 2p; (e) Cu 2p; (f) Zn 2p.

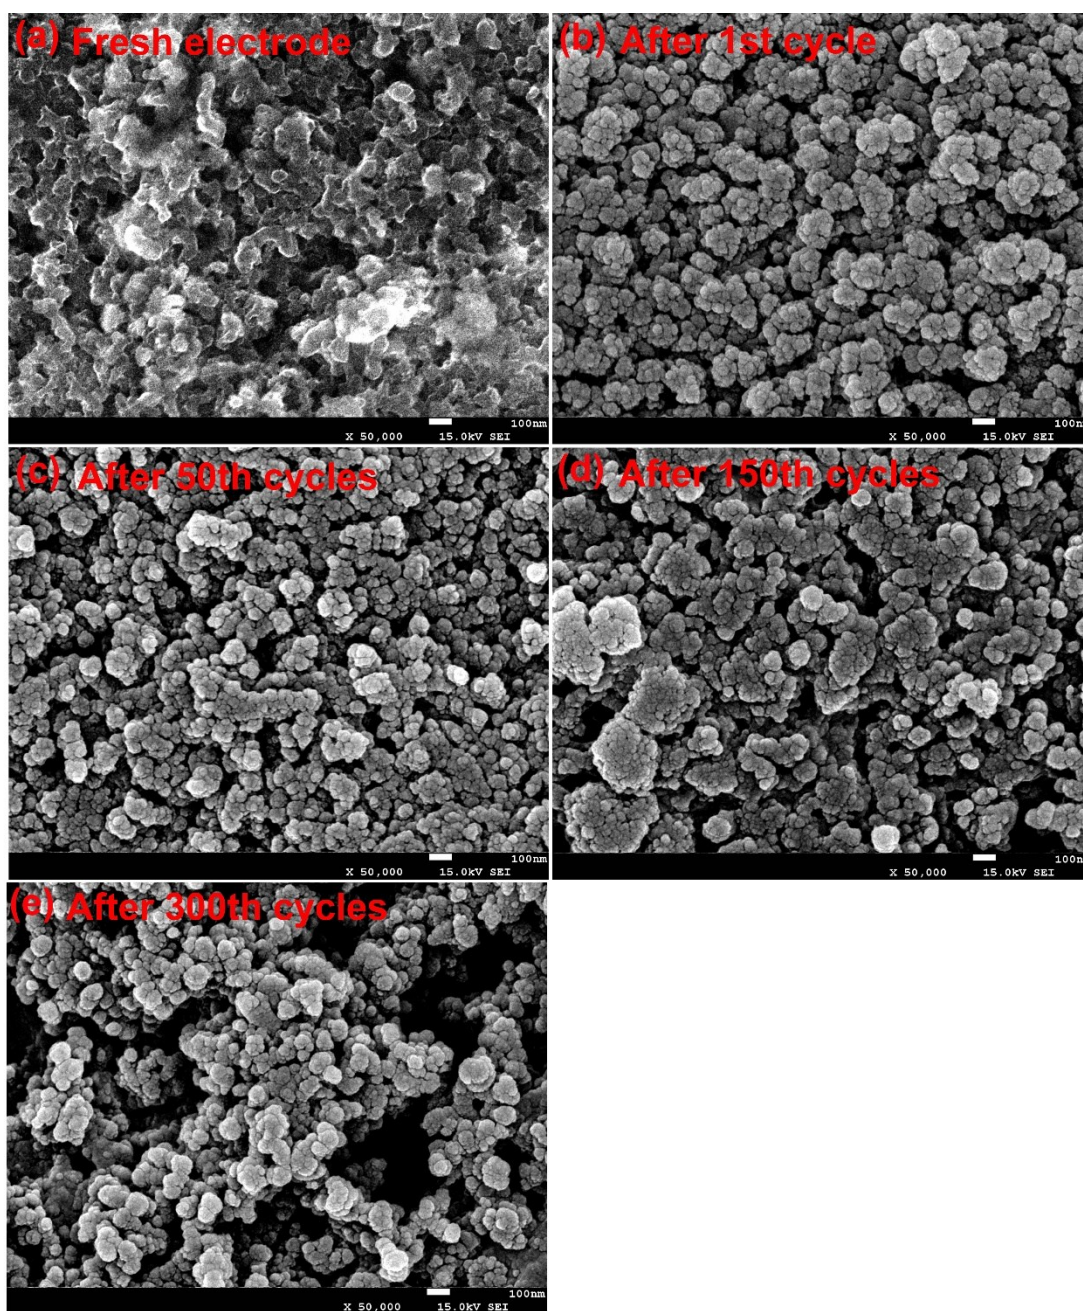

**Fig. S5** SEM results of the evolution process of  $(\text{Mg}_{0.2}\text{Ti}_{0.2}\text{Zn}_{0.2}\text{Cu}_{0.2}\text{Fe}_{0.2})_3\text{O}_4$  electrodes at a current density of  $100 \text{ mA g}^{-1}$ . Surface morphology image of (a) fresh electrode, (b) the electrode at the potential of 3.0 V after 1st discharge/charge cycle, (c) the electrode at the potential of 3.0 V after 50th cycles, (d) the electrode at the potential of 3.0 V after 150th cycles, (e) the electrode at the potential of 3.0 V after 300th cycles.

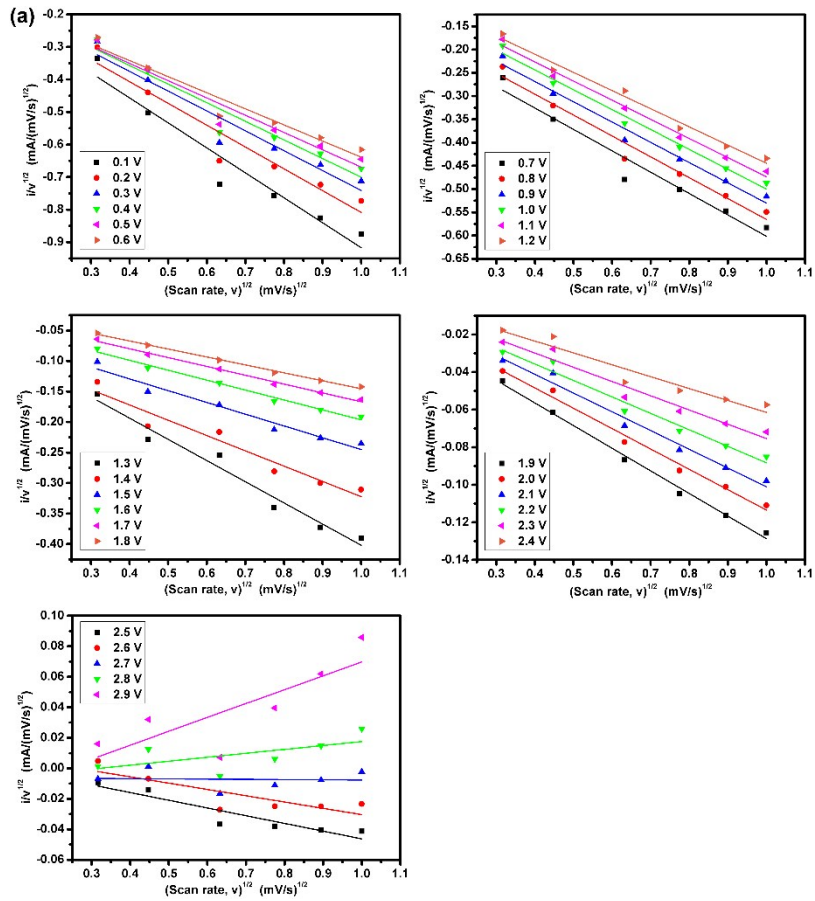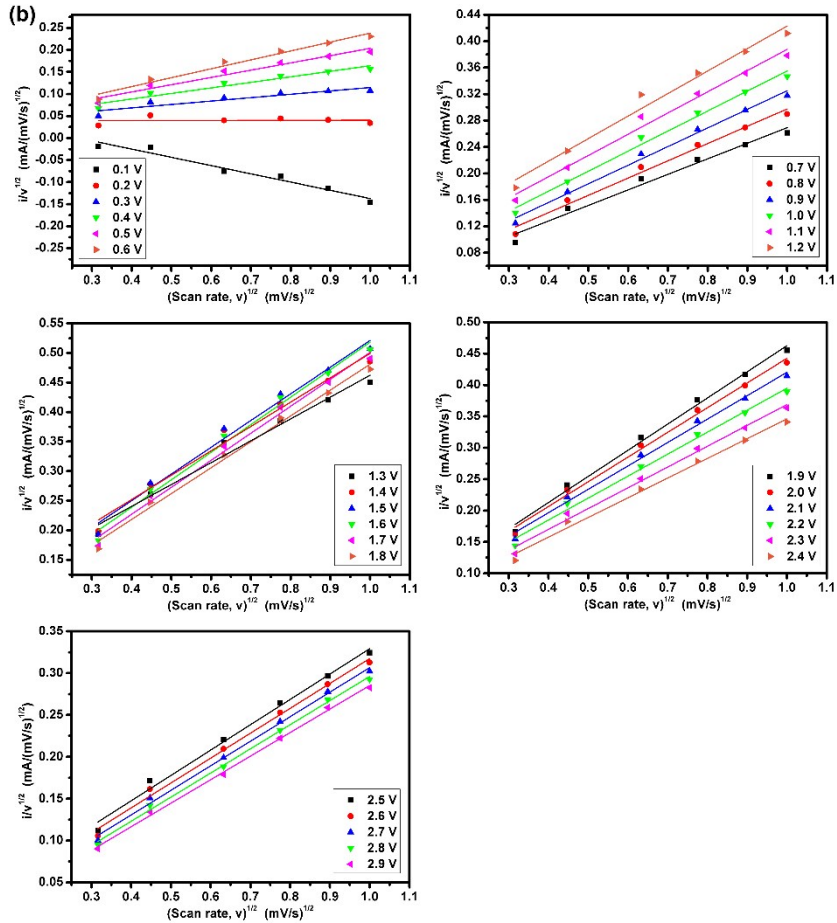

**Fig. S6** Correlation between the scan rates and corresponding currents of the  $(\text{Mg}_{0.2}\text{Ti}_{0.2}\text{Zn}_{0.2}\text{Cu}_{0.2}\text{Fe}_{0.2})_3\text{O}_4$  electrode at (a) cathodic and (b) anodic scan according to equation:  $i(V)/v^{1/2} = k_1v^{1/2} + k_2$ .

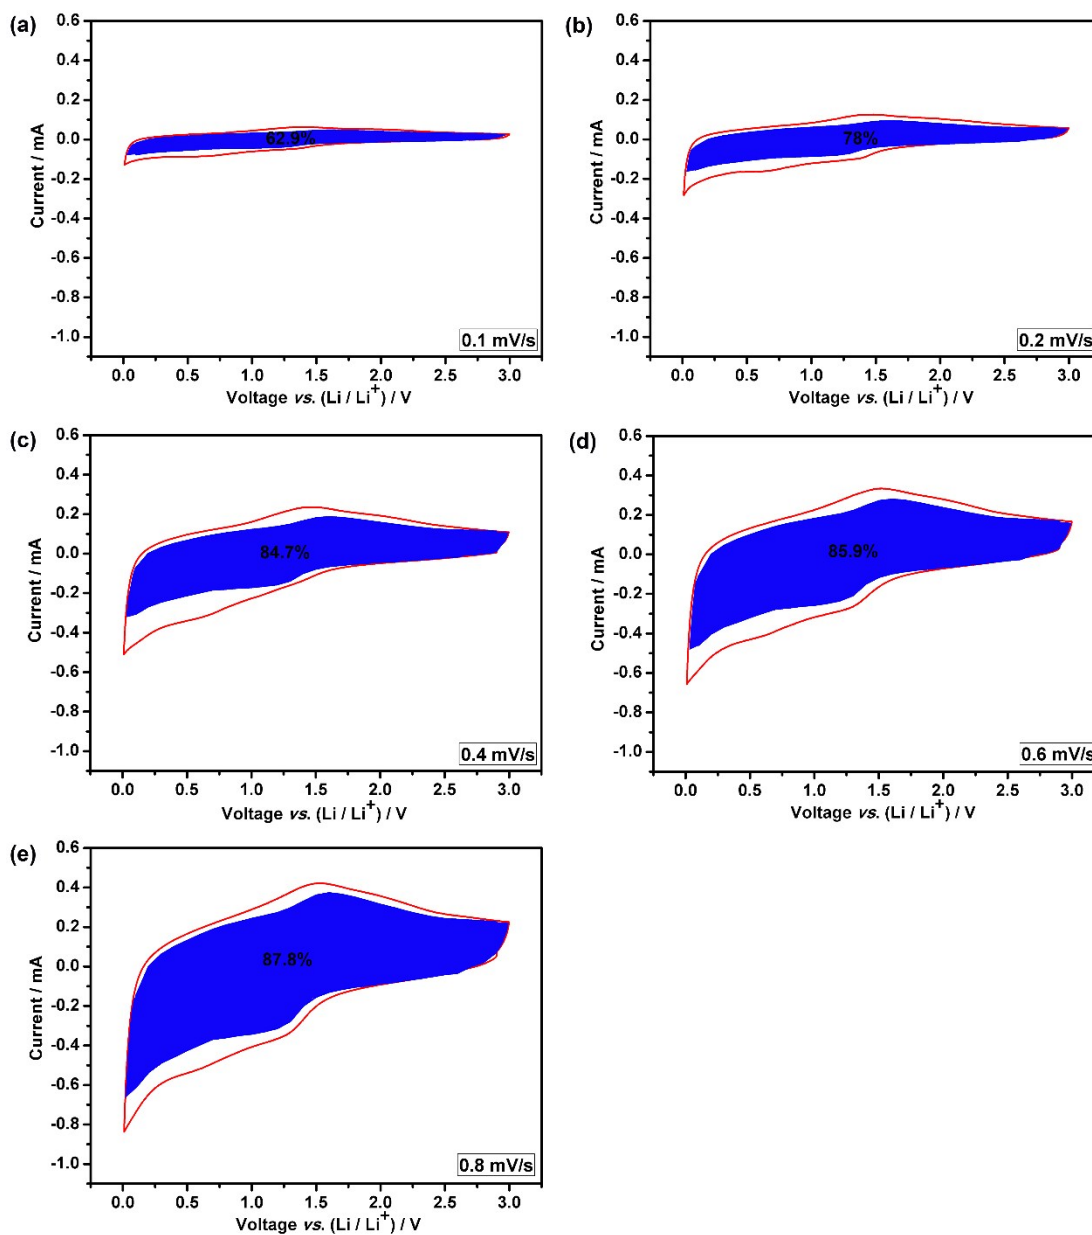

**Fig. S7** The capacitive contribution (blue shaded region) to the total current contribution (red line) for the  $(\text{Mg}_{0.2}\text{Ti}_{0.2}\text{Zn}_{0.2}\text{Cu}_{0.2}\text{Fe}_{0.2})_3\text{O}_4$  electrode at (a) 0.1, (b) 0.2, (c) 0.4, (d) 0.6, (e) 0.8  $\text{mV s}^{-1}$  vs.  $\text{Li}^+/\text{Li}$ .

| Compounds | Lattice parameters ( $\text{\AA}$ ) | Synthesized temperature ( $^{\circ}\text{C}$ ) | BET surface area | References |
|-----------|-------------------------------------|------------------------------------------------|------------------|------------|
|           |                                     |                                                |                  |            |

|                                                                                                                          |                                                                                           |      |                                          |                                                                        |
|--------------------------------------------------------------------------------------------------------------------------|-------------------------------------------------------------------------------------------|------|------------------------------------------|------------------------------------------------------------------------|
|                                                                                                                          |                                                                                           |      | (±0.1)<br>m <sup>2</sup> g <sup>-1</sup> |                                                                        |
| NiFe <sub>2</sub> O <sub>4</sub>                                                                                         | a = 8.3656(4)                                                                             | 900  | 6.88                                     | <i>Journal of Physical Chemistry C</i> , <b>2015</b> , 119, 4709-4718. |
| (Zn <sub>0.25</sub> Ni <sub>0.75</sub> )Fe <sub>2</sub> O <sub>4</sub>                                                   | a = 8.3605(6)                                                                             | 900  | 4.93                                     | <i>Journal of Physical Chemistry C</i> , <b>2015</b> , 119, 4709-4718. |
| (Zn <sub>0.5</sub> Ni <sub>0.5</sub> )Fe <sub>2</sub> O <sub>4</sub>                                                     | a = 8.3590(6)                                                                             | 900  | 2.25                                     | <i>Journal of Physical Chemistry C</i> , <b>2015</b> , 119, 4709-4718. |
| (Zn <sub>0.75</sub> Ni <sub>0.25</sub> )Fe <sub>2</sub> O <sub>4</sub>                                                   | a = 8.3663(2)                                                                             | 900  | 4.26                                     | <i>Journal of Physical Chemistry C</i> , <b>2015</b> , 119, 4709-4718. |
| ZnFe <sub>2</sub> O <sub>4</sub>                                                                                         | a = 8.4375(0)                                                                             | 900  | 0.79                                     | <i>Journal of Physical Chemistry C</i> , <b>2015</b> , 119, 4709-4718. |
| 5%ZnO.95%Fe <sub>3</sub> O <sub>4</sub>                                                                                  | For ZnO:<br>a = 3.249<br>c = 5.2046<br>For Fe <sub>3</sub> O <sub>4</sub> :<br>a = 8.4413 | 600  | 10.26                                    | <i>Electrochimica Acta</i> <b>2014</b> , 118, 75-80.                   |
| Fe <sub>2</sub> O <sub>3</sub>                                                                                           | a = 5.021<br>c = 13.734                                                                   | 280  | 18.95                                    | <i>Electrochimica Acta</i> <b>2014</b> , 118, 75-80.                   |
| Fe <sub>2</sub> O <sub>3</sub>                                                                                           | a = 5.041<br>c = 13.769                                                                   | 900  | 0.5                                      | <i>Electrochimica Acta</i> <b>2014</b> , 118, 75-80.                   |
| (Mg <sub>0.2</sub> Ti <sub>0.2</sub> Zn <sub>0.2</sub> Cu <sub>0.2</sub> Fe <sub>0.2</sub> ) <sub>3</sub> O <sub>4</sub> | a = 8.396                                                                                 | 1000 | 12.31                                    | This Work                                                              |

**Table S1.** The comparison of lattice parameter, BET surface area values between (Mg<sub>0.2</sub>Ti<sub>0.2</sub>Zn<sub>0.2</sub>Cu<sub>0.2</sub>Fe<sub>0.2</sub>)<sub>3</sub>O<sub>4</sub> and some other solid solutions reported in literature.

| Materials | The first | Capacity [mAh] | Capacity | References |
|-----------|-----------|----------------|----------|------------|
|-----------|-----------|----------------|----------|------------|

|                                                                                                                          | discharge / charge capacities [mAh g <sup>-1</sup> ] | g <sup>-1</sup> / number of cycles | [mAh g <sup>-1</sup> / current density [mA g <sup>-1</sup> ] |                                                                           |
|--------------------------------------------------------------------------------------------------------------------------|------------------------------------------------------|------------------------------------|--------------------------------------------------------------|---------------------------------------------------------------------------|
| Ni <sub>x</sub> Co <sub>3-x</sub> O <sub>4</sub> nanosheets                                                              | 2489/1340                                            | 1330/50 <sup>th</sup> cycle        | 293/1600                                                     | <i>ACS Applied Materials &amp; Interfaces</i> <b>2014</b> , 6, 9256-9264. |
| Mesoporous NiCo <sub>2</sub> O <sub>4</sub> microspheres                                                                 | 1712/1214                                            | 705/500 <sup>th</sup> cycle        | 393/1600                                                     | <i>ACS Applied Materials &amp; Interfaces</i> <b>2013</b> , 5, 981-988.   |
| Mesoporous ZnCo <sub>2</sub> O <sub>4</sub> microspheres                                                                 | 1600/1205                                            | 1256/100 <sup>th</sup> cycle       | 430/4000                                                     | <i>RSC Advances</i> <b>2015</b> , 5, 19241-19247.                         |
| Mesoporous ZnCo <sub>2</sub> O <sub>4</sub> microspheres                                                                 | 1332/979                                             | 721/80 <sup>th</sup> cycle         | 382/5000                                                     | <i>Journal of Materials Chemistry A</i> <b>2013</b> , 1, 5596-5602.       |
| ZnFe <sub>2</sub> O <sub>4</sub> nanoparticles                                                                           | 1322/933                                             | 829/100 <sup>th</sup> cycle        | 600/1560                                                     | <i>RSC Advances</i> <b>2014</b> , 4, 49212-49218.                         |
| Hollow CoFe <sub>2</sub> O <sub>4</sub> nanospheres                                                                      | 2264/1230                                            | 1185/50 <sup>th</sup> cycle        | 1030/900                                                     | <i>Nanotechnology</i> <b>2012</b> , 23, 055402.                           |
| Porous CoFe <sub>2</sub> O <sub>4</sub> nanosheets                                                                       | 1619/1139                                            | 806/200 <sup>th</sup> cycle        | 303/10000                                                    | <i>RSC Advances</i> <b>2014</b> , 4, 27488-27492.                         |
| Mn <sub>0.5</sub> Co <sub>0.5</sub> Fe <sub>2</sub> O <sub>4</sub> hollow spheres                                        | 847/526                                              | 498/500 <sup>th</sup> cycle        | 115/2000                                                     | <i>ACS Applied Materials &amp; Interfaces</i> <b>2015</b> , 7, 6300-6309. |
| Ni <sub>0.33</sub> Mn <sub>0.33</sub> Co <sub>0.33</sub> Fe <sub>2</sub> O <sub>4</sub> mesoporous nanospheres           | 955/686                                              | 490/60 <sup>th</sup> cycle         | ---                                                          | <i>Journal of Materials Chemistry A</i> <b>2014</b> , 2, 5041-5050.       |
| Ni <sub>0.33</sub> Mn <sub>0.33</sub> Co <sub>0.33</sub> Fe <sub>2</sub> O <sub>4</sub> on oxidized carbon nanotubes     | 1092/692                                             | 674/100 <sup>th</sup> cycle        | 300/1000                                                     | <i>RSC Advances</i> <b>2014</b> , 4, 33769-33775.                         |
| (Mg <sub>0.2</sub> Ti <sub>0.2</sub> Zn <sub>0.2</sub> Cu <sub>0.2</sub> Fe <sub>0.2</sub> ) <sub>3</sub> O <sub>4</sub> | 1261/634                                             | 504/300 <sup>th</sup> cycle        | 268/2000                                                     | This work                                                                 |

**Table S2.** Summary of electrochemical performance of different transition metal oxides as anode materials for lithium ion batteries.

| Samples                                         | $R_s$ [ $\Omega$ ] | $R_{ct}$ [ $\Omega$ ] | $\sigma$ [ $\Omega$ Hz <sup>1/2</sup> ] | $D_{Li^+}$ [cm <sup>2</sup> s <sup>-1</sup> ] |
|-------------------------------------------------|--------------------|-----------------------|-----------------------------------------|-----------------------------------------------|
| The fresh half-cell                             | 39.68              | 283.53                | 155.52                                  | $1.497 \times 10^{-15}$                       |
| The half-cell charged to 3.0 V after 300 cycles | 0.07               | 43.35                 | 87.61                                   | $4.716 \times 10^{-15}$                       |

**Table S3.** The kinetic parameters of the fresh (Mg<sub>0.2</sub>Ti<sub>0.2</sub>Zn<sub>0.2</sub>Cu<sub>0.2</sub>Fe<sub>0.2</sub>)<sub>3</sub>O<sub>4</sub> half-cell (at the open circuit voltage, 3.0 V) and the half-cell charged to 3.0 V after 300 discharge/charge cycles.
